# Supplementary material for: Biosynthesis of cyanogenic glucosides in Phaseolus lunatus and the evolution of oxime‐based defenses
Source: PubMed Central journal article supplement (PMC7402084; doi:10.1002/pld3.244), 2020-08-04
Supplement: PLD3-4-e00244-s001.pdf [file PLD3-4-e00244-s001.pdf]

# **SUPPLEMENTARY DATA**

**WITH**

## **Biosynthesis of Cyanogenic Glucosides in *Phaseolus lunatus* and the Evolution of Oxime-based Defenses**

Daniela Lai, Alexandra B. Maimann, Eliana Macea, César H. Ocampo, Gustavo Cardona, Martina Pičmanová, Behrooz Darbani, Carl Erik Olsen, Daniel Debouck, Bodo Raatz, Birger Lindberg Møller and Fred Rook

### Supplemental Table S1: oligonucleotide primers used in this study.

#### Degenerate primers for gene cloning.

Primers are designed based on conserved amino acid motifs distinguishing the different CYP gene families in legumes species. DNA sequences from homologous genes from *L. japonicus*, *T. repens* and *P. vulgaris* guided nucleotide selection to account for legume specific codon preference.

|                                           | Forward                                                             | Reverse                                                                   |
|-------------------------------------------|---------------------------------------------------------------------|---------------------------------------------------------------------------|
| CYP79<br>(use in 4 combinations possible) | 5'-GGYAACTYCTGATGCTTGCAAA-3'<br>5'-TGAACACYSAAATWGCNTGTATYCGCCTA-3' | 5'-AGCAACTCAGGYTGGTTTAWCATYTCTGC-3'<br>5'-CKAGCAAAYAASATYAYWGCATTGTKGT-3' |
| CYP736                                    | 5'-CTYCACATGYTAGGAAACTMCCACA-3'                                     | 5'-TAACATCTTCTCTACTCRGAGGTAC-3'                                           |
| CYP83                                     | 5'-CAMAGAAATAYGGNYCTWTATTTTCMCTT-3'                                 | 5'-TRTTGTCTTKGCTGGWATTTCTAARC-3'                                          |
| UGT85                                     | 5'-GTCYCWTTGGASMAGAMTTTGTWAAGGG-3'                                  | 5'-GAARCCYYTKTCTTTMTCRGGAAAATG-3'                                         |

#### Gene specific primers used in 5' and 3' RACE procedures

Additional (linker) primers are part of the FirstChoice™ RLM-RACE Kit (Ambion). Primers are used in consecutive PCR reactions (nested PCR).

|            | 5'- RACE                                                             | 3'-RACE                                                              |
|------------|----------------------------------------------------------------------|----------------------------------------------------------------------|
| CYP79D71   | 5'-CACCAAAATGGTGGTTATATATCCTCT-3'<br>5'-ATGAGATCATTGCACGGGGTTAGTG-3' | 5'-CAGTGGACAATCCATCAAATGCTT-3'<br>5'-GCTTTTGAATGGGCACTAGGTG-3'       |
| CYP79D72   | 5'-ACAAGGGCTGTGGTGAATATCCA-3'<br>5'-ACAAGAGAAGTGGTTATGCTTGTGG-3'     | 5'-GGTGGATAATCCATCAAATGCAG-3'<br>5'-GCAGTTGAATGGGGTCTGGCAGA-3'       |
| CYP736A222 | 5'-TATGGCTGGGACCTGCCCCAGCTTT-3'<br>5'-GGTTCGATGTGGGAGTTTTCCTAG-3'    | 5'-AAACATGTGGAGGAAAATGACTTG-3'<br>5'-AACACTAAGGTTGCACCCGGCTGG-3'     |
| CYP83E46   | 5'-TCTCTAACCCATTGTAGGACAATT-3'<br>5'-TTTAGGTGAGGAGATGACAATGGA-3'     | 5'-GTAAGAAAGAGTTTCTAGAAGAAG-3'<br>5'-GAGACTGTATCTACCAGCACCATT-3'     |
| CYP83E47   | 5'-TATCTAACCCATCATAAGACAATC-3'<br>5'-TTTAGCTGAGGAGACGACAATGGC-3'     | 5'-GTAAGAAAGAATTTCTAGAAGATC-3'<br>5'-CAGACTGTATCCAGCAGCACCAAC-3'     |
| UGT85K31   | 5'-GGTATACCCAAATCCTTCGCAACTTT-3'<br>5'-CAATTATGCAACTAATTGGAGGCACG-3' | 5'-ATAAACACATTGGAAGACTTGGAGGG-3'<br>5'-TACCATTGGTCCATTTGACTTGCTTG-3' |

#### Gateway cloning PCR primers

The primers additionally contained the attB1 and attB2 Gateway cloning sites: *ggggacaagttgtacaaaaagcaggct* and *ggggaccactttgtacaagaagctgggt*. The gene specific sequences (excluding attB1 and attB2 sites) were:

|            | Forward                   | Reverse                   |
|------------|---------------------------|---------------------------|
| CYP79-A    | 5'-ATGGAAGATGCTCGTTCTC-3' | 5'-TTAAAGGTGATATAAATGT-3' |
| CYP79-B    | 5'-ATGGTACAGTATTCTATCT-3' | 5'-TCACCCAATATAAAGTTGT-3' |
| CYP736A222 | 5'-ATGTTGCCTCAAGAAG-3'    | 5'-CTAACTAGCTAATCGG-3'    |
| CYP83-A    | 5'-ATGGTGTCACTTCTGA-3'    | 5'-TTAGATTAGATTTAGATTC-3' |
| UGT85      | 5'-ATGGACTCCCTTCAAAGCT-3' | 5'-TCAAATAGCCTTGTGGTTT-3' |

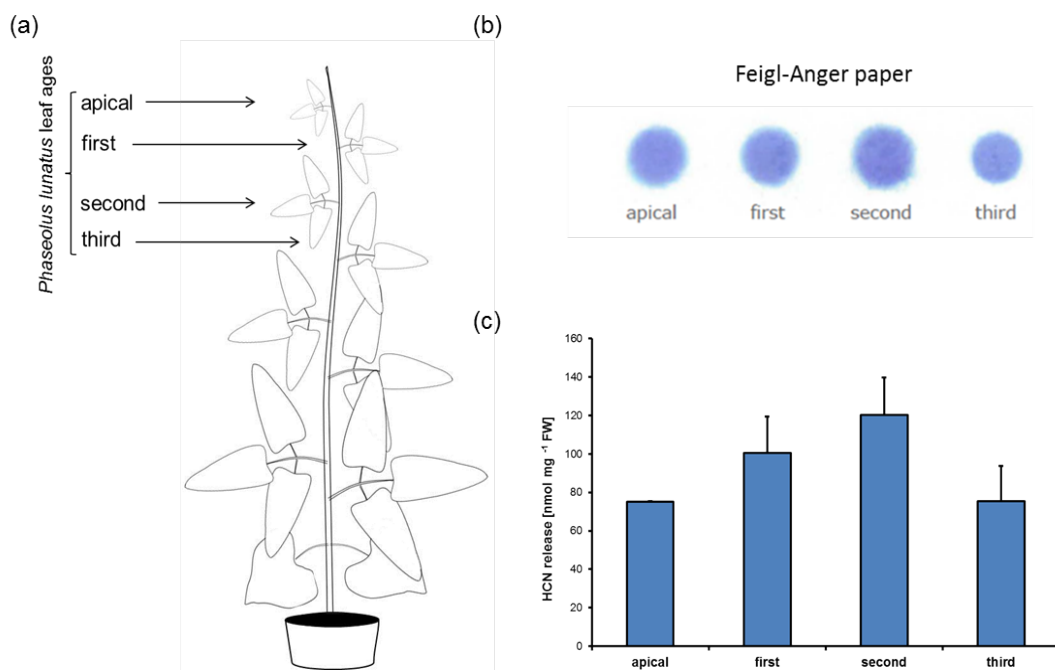

**Supplemental Figure S1.** Cyanogenic potential in young leaves of *P. lunatus*.

(a) *P. lunatus* plant overview of used leaf ages

(b) Semi-quantitative analysis of HCN release by using HCN-sensitive Feigl-Anger paper

(c) Quantitative analysis of HCN release in the apical, first, second and third leaf of *P. lunatus*. Values are the mean of three technical and three biological replicates  $\pm$  SE.

**Supplemental method:**

**Quantitative HCN detection by using a colorimetric assay**

The cyanogenic potential of *P. lunatus* leaves was determined based on the calorimetric method described by Lambert *et al.* (1975) as modified by Halkier & Møller (1989). A small plant sample (5–10 mg) was added to 200  $\mu$ l MES buffer (20 mM, pH 6.5), freeze/thawed three times on ice, and incubated at 30°C for 30 min. The incubation was stopped by freezing the samples in liquid nitrogen and addition of NaOH (40  $\mu$ l, 6 M) to the frozen samples. After thawing up the samples at RT, the hydrogen cyanide potential was determined by addition of glacial HOAc (12.5  $\mu$ l) immediately followed by 50  $\mu$ l reagent A (50 mg succinimide and 125 mg *N*-chlorosuccinimide in 50 ml water) and 50  $\mu$ l reagent B (3 g barbituric acid and 15 ml pyridine in 35 ml water). After thorough mixing and incubation (5 min), the hydrogen cyanide content was determined spectrophotometrically (450-nm to 700-nm scan; UV/VIS spectrometer, Lambda 800; Perkin-Elmer).

Lambert *et al.* *Anal. Chem.* **47**, 916–918 (1975).

Halkier, B. a & Møller, B. L. *Plant Physiol.* **90**, 1552–1559 (1989).

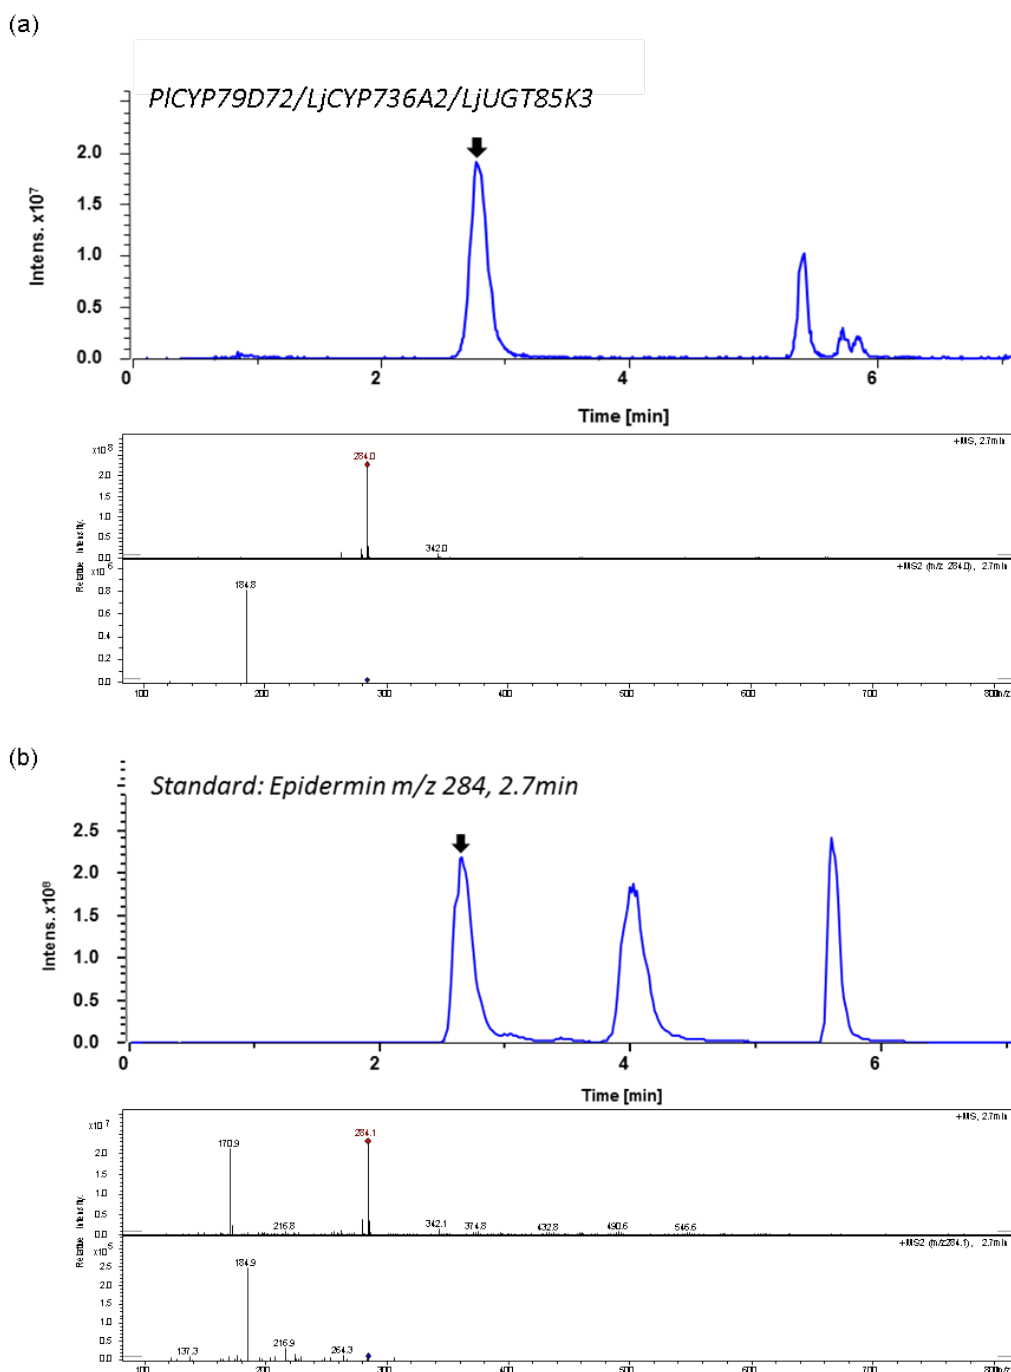

**Supplemental Figure S2: *PICYP79D72* has leucine as its substrate and in combination with *LjCYP736A2* and *LjUGT85K3* produces the  $\beta$ -hydroxynitrile glucoside epidermin.**

(a) Extracted ion chromatogram of tobacco leaves co-infiltrated with the *P. lunatus* gene *CYP79D72* and the *L. japonicus* genes *CYP736A2* and *UGT85K3*. Extracted ion peaks are for sodium adducts: epidermin (m/z 284, RT 2.7 min.) and lotaustralin (m/z 284, RT 5.5 min.). (b) Extracted ion chromatogram of an *Hordeum vulgare* leaf extract. Extracted ion peaks are for sodium adducts: epidermin (m/z 284, RT 2.7 min.), dihydroosmaronin (m/z 284, RT 4.1 min.) and epiheterodendrin (m/z 284, RT 5.6 min.). Mass spectra of the m/z 284 ion and its fragmentation (MS2) are for the epidermin peak (indicated with arrow).

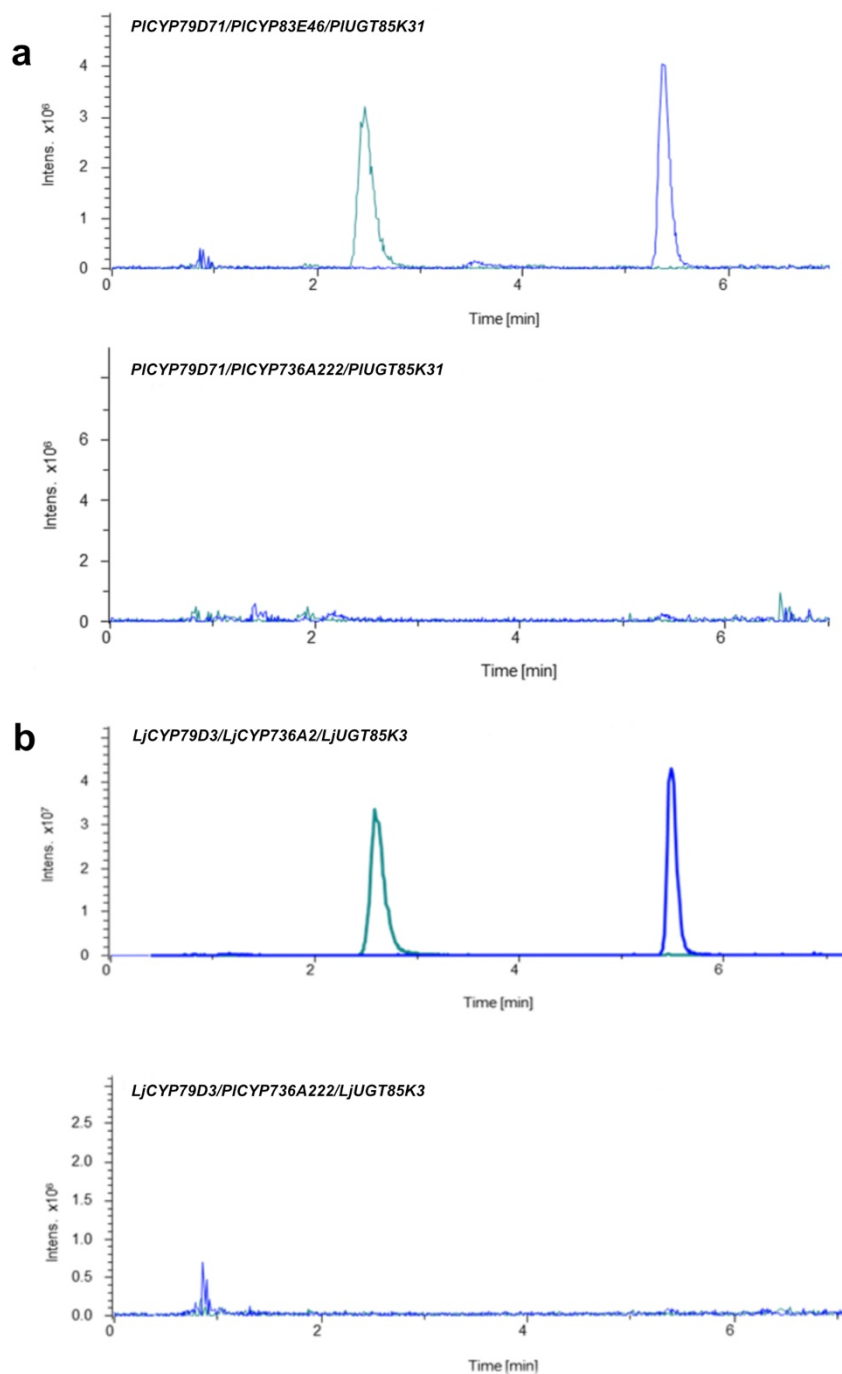

**Supplemental Figure S3: CYP736A222 does not substitute for CYP83E46 or CYP736A2 in the production of linamarin and lotaustralin.**

Extracted ion chromatogram of tobacco leaves co-infiltrated with (a) the indicated *P. lunatus* gene combinations, or (b) the *L. japonicus* biosynthetic genes in combination with *PICYP736A222*. Extracted ion peaks are for sodium adducts: linamarin (m/z 270, cyan), lotaustralin (m/z 284, blue).

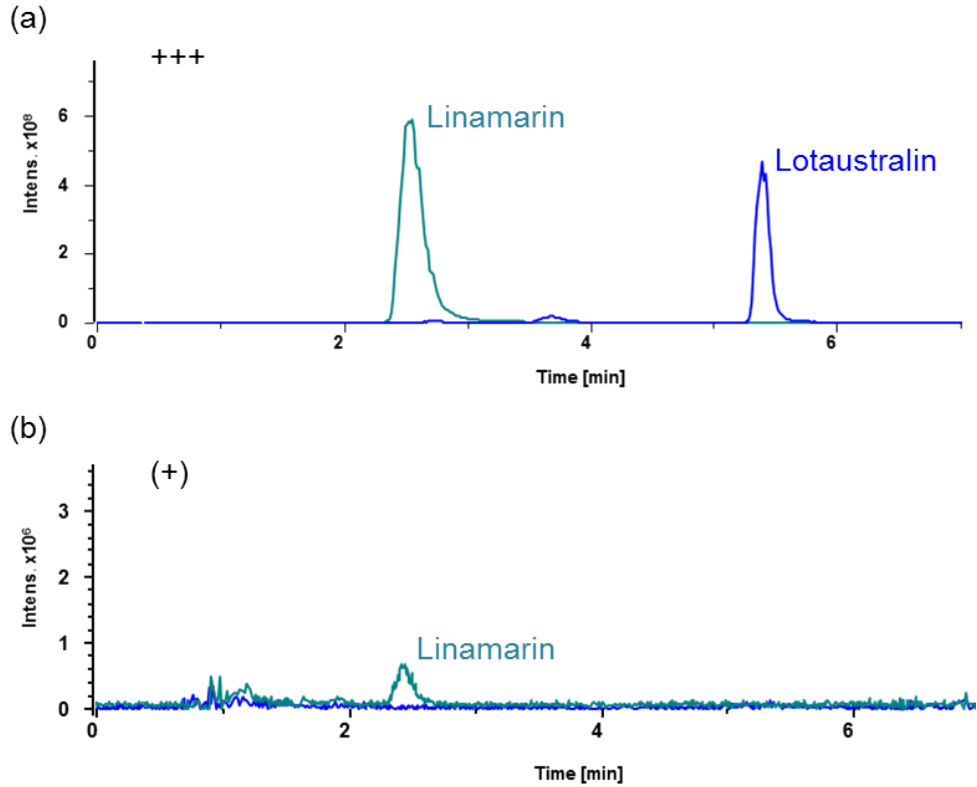

**Supplemental Figure S4: Examples of differences in cyanogenic glucosides levels in *Phaseolus spp.* accessions.**

Extracted ion chromatogram of two *Phaseolus spp.* accessions with high levels of cyanogenic glucosides in (a) and only trace amounts in (b). Note the 100x difference in the scaling of signal intensity ( $10^6$  versus  $10^8$ ). Extracted ion peaks are for sodium adducts: linamarin (m/z 270, cyan) and lotaustralin (m/z 284, blue).

**Supplemental Table S2. *Phaseolus* spp. natural and cultivated accessions selected from the CIAT germplasm collection and tested for cyanogenesis and the presence of the cyanogenic glucosides linamarin and lotaustralin in leaf extracts.**

1) Cyanogenesis was determined by HCN detection with Feigl-Anger paper. An accession was considered polymorphic (or segregating) if separate individual plants showed a different response.

2) Relative signal strength in extracted ion chromatograms of cyanogenic glucosides: - = not detectable; (+) = possible trace amount; + = detectable; ++ = clearly present; +++ = abundant.

3) Countries of origin: ARG (Argentina), AZE (Azerbaijan), BDI (Burundi), BMU (Bermuda), BOL (Bolivia), BRZ (Brazil), CHL (Chile), CHN (China), CMR (Cameroon), COD (Democratic Republic of the Congo), COL (Colombia), CRI (Costa Rica), CUB (Cuba), DOM (Dominican Republic), ECU (Ecuador), ESP (Spain), ETH (Ethiopia), FRA (France), GHA (Ghana), GTM (Guatemala), HND (Honduras), HTI (Haiti), IND (India), ITA (Italy), JAM (Jamaica), LBR (Liberia), MEX (Mexico), MMR (Myanmar), MWI (Malawi), NGA (Nigeria), NLD (Netherlands), PER (Peru), PHL (Philippines), PRI (Puerto Rico), RWA (Rwanda), SLV (El Salvador), TUR (Turkey), TZA (United Republic of Tanzania), USA (United States of America), ZWB (Zambia).

| Species name            | CIAT Accession Nr. | Cyanogenesis <sup>1</sup> | Cyanogenic glucosides <sup>2</sup> |              | Country <sup>3</sup> | Type       |
|-------------------------|--------------------|---------------------------|------------------------------------|--------------|----------------------|------------|
|                         |                    |                           | Linamarin                          | Lotaustralin |                      |            |
| <i>P. acutifolius</i>   | G40175             | negative                  | -                                  | -            | USA                  | cultivated |
|                         | G40111             | negative                  | -                                  | -            | MEX                  | cultivated |
|                         | G40254             | negative                  | -                                  | -            | MEX                  | natural    |
|                         | G40080             | negative                  | -                                  | -            | MEX                  | natural    |
|                         | G40163             | negative                  | -                                  | -            | MEX                  | cultivated |
|                         | G40299             | negative                  | -                                  | -            | GTM                  | cultivated |
|                         | G40283             | negative                  | -                                  | -            | USA                  | cultivated |
|                         | G40027             | negative                  | -                                  | -            | CRI                  | cultivated |
|                         | G40206             | negative                  | -                                  | -            | MEX                  | natural    |
| <i>P. albescens</i>     | G40897             | negative                  | -                                  | -            | MEX                  | natural    |
| <i>P. altimontanus</i>  | G40568             | negative                  | -                                  | -            | MEX                  | natural    |
| <i>P. angustissimus</i> | G40685             | negative                  | -                                  | -            | USA                  | natural    |
| <i>P. augusti</i>       | G40729             | polymorphic               | ++                                 | ++           | PER                  | natural    |

|                          |               |             |     |     |     |            |
|--------------------------|---------------|-------------|-----|-----|-----|------------|
|                          | <b>G40716</b> | positive    | ++  | +   | ARG | natural    |
|                          | <b>G40759</b> | positive    | +++ | ++  | BOL | natural    |
| <i>P. carterae</i>       | <b>G40675</b> | negative    | -   | -   | MEX | natural    |
| <i>P. chiapasanus</i>    | <b>G40676</b> | negative    | (+) | -   | MEX | natural    |
| <i>P. coccineus</i>      | <b>G35055</b> | negative    | +   | -   | MEX | cultivated |
|                          | <b>G36136</b> | negative    | -   | -   | MEX | natural    |
|                          | <b>G35876</b> | negative    | -   | -   | GTM | natural    |
|                          | <b>G35205</b> | negative    | -   | -   | GTM | cultivated |
| <i>P. costaricensis</i>  | <b>G40807</b> | negative    | -   | -   | CRI | natural    |
|                          | <b>G40853</b> | negative    | -   | -   | CRI | natural    |
|                          | <b>G40894</b> | negative    | +   | (+) | CRI | natural    |
| <i>P. dumosus</i>        | <b>G35631</b> | negative    | -   | -   | GTM | cultivated |
|                          | <b>G35314</b> | negative    | -   | -   | COL | cultivated |
|                          | <b>G35550</b> | negative    | -   | -   | MEX | cultivated |
|                          | <b>G35855</b> | negative    | -   | -   | GTM | natural    |
|                          | <b>G35584</b> | negative    | -   | -   | GTM | cultivated |
| <i>P. esperanzae</i>     | <b>G40817</b> | negative    | (+) | -   | MEX | natural    |
| <i>P. filiformis</i>     | <b>G40512</b> | negative    | -   | -   | USA | natural    |
| <i>P. glabellus</i>      | <b>G40797</b> | negative    | (+) | -   | MEX | natural    |
| <i>P. grayanus</i>       | <b>G40517</b> | negative    | -   | -   | MEX | natural    |
| <i>P. lepstostachyus</i> | <b>G40620</b> | negative    | -   | -   | MEX | natural    |
| <i>P. lignosus</i>       | <b>G40876</b> | positive    | +++ | ++  | BMU | natural    |
| <i>P. lunatus</i>        | <b>G26191</b> | polymorphic | ++  | +   | NGA | cultivated |
|                          | <b>G25253</b> | polymorphic | ++  | ++  | CMR | cultivated |
|                          | <b>G26193</b> | negative    | -   | -   | COD | cultivated |
|                          | <b>G25694</b> | polymorphic | +++ | +++ | ETH | cultivated |
|                          | <b>G26195</b> | polymorphic | ++  | ++  | RWA | cultivated |
|                          | <b>G25237</b> | polymorphic | ++  | +   | IND | cultivated |



|                |             |     |     |     |            |
|----------------|-------------|-----|-----|-----|------------|
| <b>G27616</b>  | positive    | +++ | ++  | IND | cultivated |
| <b>G25247D</b> | positive    | +++ | ++  | GHA | cultivated |
| <b>G27209</b>  | positive    | +++ | ++  | LBR | cultivated |
| <b>G25969</b>  | polymorphic | ++  | +   | CHN | cultivated |
| <b>G25820</b>  | positive    | +++ | ++  | PHL | cultivated |
| <b>G25625</b>  | polymorphic | +++ | ++  | USA | cultivated |
| <b>G25799</b>  | positive    | +++ | ++  | MEX | cultivated |
| <b>G26534</b>  | polymorphic | +++ | ++  | MEX | cultivated |
| <b>G27399</b>  | polymorphic | +++ | ++  | MEX | cultivated |
| <b>G25975</b>  | positive    | +++ | ++  | GTM | cultivated |
| <b>G25295</b>  | polymorphic | +++ | ++  | CUB | cultivated |
| <b>G27553</b>  | positive    | +++ | ++  | DOM | cultivated |
| <b>G25616</b>  | positive    | +++ | ++  | HTI | cultivated |
| <b>G25869</b>  | polymorphic | +++ | ++  | COL | cultivated |
| <b>G27309</b>  | positive    | +++ | ++  | ECU | cultivated |
| <b>G27416</b>  | positive    | +++ | +++ | PER | cultivated |
| <b>G25990</b>  | polymorphic | +++ | ++  | BOL | cultivated |
| <b>G25785</b>  | positive    | ++  | +   | MEX | natural    |
| <b>G26517</b>  | positive    | +++ | ++  | MEX | natural    |
| <b>G26360</b>  | positive    | +++ | ++  | MEX | natural    |
| <b>G26681</b>  | positive    | ++  | ++  | GTM | natural    |
| <b>G26629</b>  | polymorphic | +   | -   | HND | natural    |
| <b>G25294D</b> | positive    | +++ | +++ | CUB | natural    |
| <b>G27339</b>  | positive    | ++  | +   | PRI | natural    |
| <b>G27609</b>  | positive    | ++  | +   | SLV | natural    |
| <b>G26606</b>  | polymorphic | +++ | ++  | ECU | natural    |
| <b>G26348</b>  | positive    | ++  | +   | PER | natural    |
| <b>G26547</b>  | positive    | +++ | +   | PER | natural    |

|                |             |     |     |     |            |
|----------------|-------------|-----|-----|-----|------------|
| <b>G25392C</b> | positive    | ++  | +   | CRI | cultivated |
| <b>G25294B</b> | positive    | ++  | +   | CUB | cultivated |
| <b>G26164</b>  | polymorphic | ++  | +   | MEX | cultivated |
| <b>G26221</b>  | positive    | +++ | ++  | USA | cultivated |
| <b>G25872J</b> | positive    | ++  | +   | COL | cultivated |
| <b>G25372A</b> | positive    | ++  | +   | SLV | cultivated |
| <b>G25007</b>  | polymorphic | +++ | ++  | BRZ | cultivated |
| <b>G27580A</b> | positive    | +++ | ++  | ZWB | cultivated |
| <b>G25697</b>  | positive    | ++  | +   | ECU | cultivated |
| <b>G25219</b>  | positive    | +   | (+) | MEX | natural    |
| <b>G25541C</b> | positive    | ++  | +   | ARG | cultivated |
| <b>G26615</b>  | positive    | +++ | ++  | COL | natural    |
| <b>G25575B</b> | positive    | +++ | ++  | PER | cultivated |
| <b>G25713A</b> | positive    | +++ | ++  | MEX | natural    |
| <b>G25695</b>  | positive    | +++ | ++  | PHL | natural    |
| <b>G27519</b>  | positive    | +   | -   | HTI | cultivated |
| <b>G26468</b>  | polymorphic | ++  | +   | ECU | natural    |
| <b>G25299</b>  | positive    | ++  | +   | IND | cultivated |
| <b>G26533</b>  | negative    | ++  | +   | MEX | natural    |
| <b>G25255A</b> | polymorphic | +++ | ++  | ETH | cultivated |
| <b>G26459</b>  | polymorphic | ++  | +   | ECU | natural    |
| <b>G26653</b>  | negative    | ++  | +   | GTM | natural    |
| <b>G25246A</b> | positive    | ++  | +   | GHA | cultivated |
| <b>G25915</b>  | polymorphic | +++ | +   | PER | natural    |
| <b>G27414</b>  | positive    | ++  | +   | MEX | natural    |
| <b>G26767</b>  | positive    | ++  | +   | LBR | cultivated |
| <b>G27573</b>  | polymorphic | ++  | +   | GTM | natural    |
| <b>G25578</b>  | positive    | ++  | +   | BOL | cultivated |

|                           |         |             |     |     |     |            |
|---------------------------|---------|-------------|-----|-----|-----|------------|
|                           | G27465  | positive    | +++ | +   | MMR | cultivated |
|                           | G25913  | polymorphic | ++  | +   | PER | natural    |
|                           | G25239  | polymorphic | ++  | +   | GTM | cultivated |
|                           | G27574  | polymorphic | ++  | +   | AZE | cultivated |
|                           | G25388A | positive    | ++  | +   | CRI | natural    |
|                           | G25540  | positive    | ++  | +   | ARG | cultivated |
|                           | G26805  | polymorphic | ++  | +   | NGA | cultivated |
|                           | G26749  | negative    | +   | +   | ARG | natural    |
|                           | G25315  | negative    | +++ | ++  | JAM | cultivated |
| <i>P. macrolepis</i>      | G40863  | negative    | (+) | -   | GTM | natural    |
| <i>P. maculatus</i>       | G40809  | positive    | ++  | +   | MEX | natural    |
| <i>P. macvaughii</i>      | G40760  | negative    | -   | (+) | MEX | natural    |
| <i>P. magnilobatus</i>    | G40514  | negative    | (+) | -   | MEX | natural    |
| <i>P. marechalii</i>      | G40812  | positive    | +   | ++  | MEX | natural    |
| <i>P. microcarpus</i>     | G40538  | negative    | -   | -   | MEX | natural    |
| <i>P. nodosus</i>         | G40899  | positive    | +   | ++  | MEX | natural    |
| <i>P. oaxacanus</i>       | G40861  | negative    | -   | -   | MEX | natural    |
| <i>P. oligospermus</i>    | G40595  | negative    | -   | -   | CRI | natural    |
| <i>P. pachyrrhizoides</i> | G40770  | positive    | +++ | ++  | PER | natural    |
| <i>P. parvifolius</i>     | G40185  | negative    | +   | -   | GTM | natural    |
| <i>P. pedicellatus</i>    | G40589  | negative    | -   | -   | MEX | natural    |
| <i>P. polystachios</i>    | G40783  | positive    | +   | +   | USA | natural    |
| <i>P. pluriflorus</i>     | G40532  | negative    | -   | -   | MEX | natural    |
| <i>P. rotundatus</i>      | G40728  | positive    | ++  | ++  | MEX | natural    |
| <i>P. salicifolius</i>    | G40860  | positive    | +   | +   | MEX | natural    |
| <i>P. talamancenis</i>    | G40814  | negative    | -   | -   | CRI | natural    |
| <i>P. vulgaris</i>        | G11032A | negative    | -   | -   | MEX | natural    |
|                           | G12866A | negative    | (+) | -   | MEX | natural    |

|  |                |          |     |   |     |            |
|--|----------------|----------|-----|---|-----|------------|
|  | <b>G12882B</b> | negative | -   | - | MEX | natural    |
|  | <b>G24576</b>  | negative | (+) | - | MEX | natural    |
|  | <b>G24323</b>  | negative | -   | - | MEX | natural    |
|  | <b>G50505A</b> | negative | -   | - | GTM | natural    |
|  | <b>G23436</b>  | negative | -   | - | GTM | natural    |
|  | <b>G51062</b>  | negative | -   | - | CRI | natural    |
|  | <b>G24798</b>  | negative | -   | - | COL | natural    |
|  | <b>G23582</b>  | negative | -   | - | ECU | natural    |
|  | <b>G23583</b>  | negative | -   | - | PER | natural    |
|  | <b>G19889</b>  | negative | -   | - | ARG | natural    |
|  | <b>G16392</b>  | negative | -   | - | USA | cultivated |
|  | <b>G11108</b>  | negative | -   | - | MEX | cultivated |
|  | <b>G9712</b>   | negative | -   | - | MEX | cultivated |
|  | <b>G6992</b>   | negative | -   | - | MEX | cultivated |
|  | <b>G79</b>     | negative | -   | - | SLV | cultivated |
|  | <b>G23980</b>  | negative | -   | - | COL | cultivated |
|  | <b>G18324</b>  | negative | -   | - | PER | cultivated |
|  | <b>G12031</b>  | negative | -   | - | PER | cultivated |
|  | <b>G23769D</b> | negative | -   | - | PER | cultivated |
|  | <b>G50468C</b> | negative | (+) | - | BOL | cultivated |
|  | <b>G18355</b>  | negative | -   | - | CHL | cultivated |
|  | <b>G13942</b>  | negative | -   | - | ARG | cultivated |
|  | <b>G1477</b>   | negative | -   | - | ESP | cultivated |
|  | <b>G8013</b>   | negative | -   | - | FRA | cultivated |
|  | <b>G18048</b>  | negative | -   | - | NLD | cultivated |
|  | <b>G3815</b>   | negative | (+) | - | ITA | cultivated |
|  | <b>G15568</b>  | negative | -   | - | TUR | cultivated |
|  | <b>G766</b>    | negative | -   | - | ETH | cultivated |

|                |          |   |   |     |            |
|----------------|----------|---|---|-----|------------|
| <b>G19151A</b> | negative | - | - | TZA | cultivated |
| <b>G22534</b>  | negative | - | - | BDI | cultivated |
| <b>G15366</b>  | negative | - | - | MWI | cultivated |
| <b>G467</b>    | negative | - | - | IND | cultivated |
| <b>G24279</b>  | negative | - | - | CHN | cultivated |
| <b>G24317</b>  | negative | - | - | CHN | cultivated |
| <b>G23470</b>  | negative | - | - | MEX | natural    |
| <b>G10655</b>  | negative | - | - | GTM | cultivated |
| <b>G21117</b>  | negative | - | - | COL | natural    |
| <b>G23617A</b> | negative | - | - | BOL | cultivated |
| <b>G6386</b>   | negative | - | - | MEX | natural    |
| <b>G2756</b>   | negative | - | - | HND | cultivated |
| <b>G23725</b>  | negative | - | - | ECU | natural    |
| <b>G21044A</b> | negative | - | - | ARG | cultivated |
| <b>G24382</b>  | negative | - | - | MEX | natural    |
| <b>G51648</b>  | negative | - | - | CRI | cultivated |
| <b>G23421</b>  | negative | - | - | PER | natural    |
| <b>G4830</b>   | negative | - | - | BRZ | cultivated |
| <b>G12855A</b> | negative | - | - | GTM | natural    |
| <b>G51281</b>  | negative | - | - | COL | cultivated |
| <b>G23458</b>  | negative | - | - | PER | natural    |
| <b>G5818</b>   | negative | - | - | CHL | cultivated |
| <b>G23478</b>  | negative | - | - | GTM | natural    |
| <b>G23445B</b> | negative | - | - | BOL | natural    |
| <b>G23416</b>  | negative | + | - | CRI | natural    |
| <b>G19898</b>  | negative | - | - | ARG | natural    |
| <b>G19918</b>  | negative | - | - | MEX | cultivated |
| <b>G12361</b>  | negative | - | - | ECU | cultivated |

|                        |               |          |   |   |     |            |
|------------------------|---------------|----------|---|---|-----|------------|
|                        | <b>G2433</b>  | negative | - | - | MEX | cultivated |
|                        | <b>G12120</b> | negative | - | - | PER | cultivated |
| <i>P. zimapanensis</i> | <b>G40556</b> | negative | - | - | MEX | natural    |
